# Supplementary material
Source: publisher site journal article supplement (https://www.dovepress.com/article/259158)
Supplement: Supplementary file 1 [file get_supplementary_file.php]

**Supplementary materials**

**Table S1:** Data obtained for Carajurin’s analytical curve of analytical analysis according to Wen et al.1 performed with a Shimadzu series High Pressure Liquid Chromatography (HPLC) system.

| **Concentration (µg mL-1)** | **Area 1** | **Area 2** | **Area 3** | **Average Area** | **S.d.*** | **CV**  **(%)**** |
| --- | --- | --- | --- | --- | --- | --- |
| **9.94** | 265052 | 247060 | 253696 | 255269 | 9098,6 | 3.56 |
| **19.9** | 496142 | 488425 | 499905 | 494824 | 5852,4 | 1.18 |
| **49.7** | 1200332 | 1188052 | 1193062 | 1193815 | 6174,6 | 0.52 |
| **74.6** | 1826550 | 1938315 | 1845508 | 1870124 | 59810,8 | 3.20 |
| **124.3** | 3072762 | 3072032 | 3103528 | 3082774 | 17977,2 | 0.58 |
| **149.1** | 3818296 | 3713887 | 3834134 | 3788772 | 65334,3 | 1.72 |

*Standard deviation from 3 analytical curves areas.

** Coefficient of variation.

**Figure S1:** Analytical curve from Carajurin marker of analytical analysis according to Wen et al.1 performed with a Shimadzu series High Pressure Liquid Chromatography (HPLC) system.

**Figure S2:** Chromatographic profile of *Arrabidaea chica* extract of analytical analysis according to Wen et al.1 performed with a Shimadzu series High Pressure Liquid Chromatography (HPLC) system.

Shimadzu, column C18 Gemini, λ=470nm, flux 1 mL/min, oven 35 °C and software Class VP –5, (RT=5.8 min) (6,7,3’,4’-tetra-hydroxy-5-methoxyflavylium) (RT= 7.9 min) (6,7-tri-hydoxy-5-methoxyflavylium) and (RT=15,8) (6,7-di-hydroxy-5,4’-dimethoxyflavylium, Carajurin).

Reference

1. Wen D, Li C, Di H, Liao Y, Liu H. A Universal HPLC Method for the Determination of Phenolic Acids in Compound Herbal Medicines. *J Agric Food Chem*. 2005;53(17):6624-6629. doi:10.1021/jf0511291
